# Supplementary material for: Metabolic Coupling Determines the Activity: Comparison of 11β-Hydroxysteroid Dehydrogenase 1 and Its Coupling between Liver Parenchymal Cells and Testicular Leydig Cells
Source: PubMed Central journal article supplement (PMC4631333; doi:10.1371/journal.pone.0141767), 2015-11-03

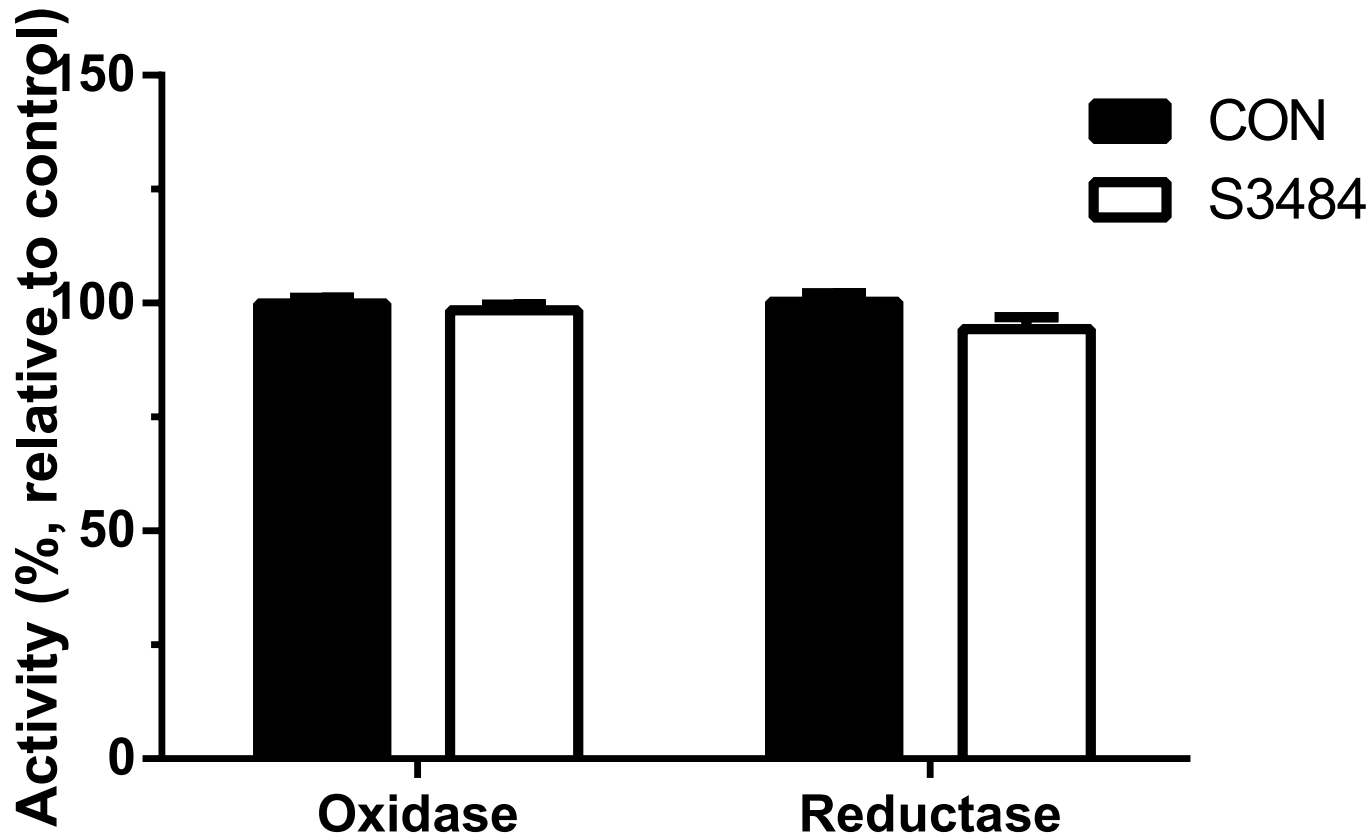

Supplement: pone.0141767.s003.pdf [file pone.0141767.s003.pdf]
